# Supplementary material for: Inactivating NF1 Mutations Are Enriched in Advanced Breast Cancer and Contribute to Endocrine Therapy Resistance
Source: Oxford University Press journal article supplement (doi:10.1158/1078-0432.ccr-18-4044), 2019-10-07
Supplement: 10780432ccr184044-sup-213611_2_supp_5737865_pwwn1f.xlsx [file 10780432ccr184044-sup-213611_2_supp_5737865_pwwn1f.xlsx]

## Sheet: Supplementary Table 1
Gene list for mutations only
AKT1
ATM
CDKN1B
ERBB3
GATA3
MAP3K1
NF1
PIK3CA
PIK3R1
SF3B1
Genes for mutations and copy number
EGFR
ERBB2
ESR1
FGFR1
FGFR2
MAP2K4
PTEN
BRCA1
BRCA2
TP53
CDH1
RB1
CDKN2A
CDKN2B
CDKN1A
MCL1
CCND1
MET
MYC
IGF1R
KIT
PDGFRA
MDM2
CDK4
CCNE1
Fusion genes
FGFR1
FGFR2
FGFR3
Hotspots only
KRAS
KRAS
KRAS
BRAF
AKT2
AKT3
NRAS
NRAS
NRAS

## Sheet: Supplementary Table 2 
Gene Name	Probe NSID
ACTB	NM_001101.2:1685
AKT1	NM_001014432.1:1275
ANLN	NM_018685.2:240
AURKA	NM_003600.2:405
BCL2	NM_000633.2:1525
BCL2L1	NM_001191.2:260
BIRC5	NM_001168.2:1215
BLVRA	NM_000712.3:485
CCNB1	NM_031966.2:710
CCND1	NM_053056.2:690
CCNE1	NM_001238.1:1155
CD80	NM_005191.3:674
CD8A	NM_001768.5:1320
CDC20	NM_001255.1:915
CDC6	NM_001254.3:1655
CDH1	NM_004360.2:535
CENPF	NM_016343.3:9260
CEP55	NM_018131.3:570
CRABP2	NM_001199723.1:802
EGFR	NM_005228.3:2760
ERBB2	NM_004448.2:2405
ERBB3	NM_001005915.1:420
ESR1	NM_000125.2:1595
EXO1	NM_006027.3:820
FKBP4	NM_002014.3:310
FMN1	NM_001103184.1:3315
FOXA1	NM_004496.2:280
FOXO3	NM_001455.2:1860
GATA3	NM_001002295.1:1691
GRB7	NM_005310.2:1010
GREB1	NM_014668.3:1360
HSD17B7	NM_001304512.1:541
IGF1R	NM_000875.3:10810
IL6ST	NM_001190981.1:1088
KDR	NM_002253.2:1420
MAP2K1	NM_002755.2:970
MAP2K2	NM_030662.2:1325
MAP2K4	NM_003010.2:771
MAPT	NM_016835.3:1425
MELK	NM_014791.2:365
MKI67	NM_002417.2:2005
MPZL1	NM_003953.4:2975
MRPL19	NM_014763.3:385
MTOR	NM_004958.3:1865
MYBL2	NM_002466.2:675
NAT1	NM_000662.4:0
NCOA1	NM_003743.4:1225
NCOA3	NM_181659.1:4520
NCOR1	NM_006311.3:1390
NCOR2	NM_006312.3:1490
NDUFC2	NM_001204054.1:1235
NF1	NM_000267.2:1035
NUSAP1	NM_018454.6:1035
PDZK1	NM_002614.4:244
PGR	NM_000926.2:3165
PIK3CA	NM_006218.2:2445
PIK3R2	NM_005027.2:3100
PSMC4	NM_006503.2:300
RARA	NM_001033603.1:1190
RRM2	NM_001034.1:490
SF3A1	NM_005877.4:1485
SH2B1	NM_001145796.1:1276
SLC39A6	NM_012319.2:1580
STC2	NM_003714.2:2825
TBP	NM_001172085.1:587
TFAP2C	NM_003222.3:1410
TFF1	NM_003225.2:210
TFF3	NM_003226.3:585
UBE2T	NM_014176.1:50
XBP1	NM_005080.2:440

## Sheet: Supplementary Table 3
Human Estrogen Receptor RT2 Profiler PCR Array (330231, PAHS-005ZA-24, Qiagen)
Position	UniGene	GenBank	Symbol	Description
A01	Hs.171189	NM_001621	AHR	Aryl hydrocarbon receptor
A02	Hs.463506	NM_003488	AKAP1	A kinase (PRKA) anchor protein 1
A03	Hs.372840	NM_001164	APBB1	Amyloid beta (A4) precursor protein-binding, family B, member 1
A04	Hs.479747	NM_014567	BCAR1	Breast cancer anti-estrogen resistance 1
A05	Hs.516966	NM_138578	BCL2L1	BCL2-like 1
A06	Hs.502182	NM_001709	BDNF	Brain-derived neurotrophic factor
A07	Hs.68879	NM_130851	BMP4	Bone morphogenetic protein 4
A08	Hs.473163	NM_001719	BMP7	Bone morphogenetic protein 7
A09	Hs.194143	NM_007294	BRCA1	Breast cancer 1, early onset
A10	Hs.529053	NM_000064	C3	Complement component 3
A11	Hs.74034	NM_001753	CAV1	Caveolin 1, caveolae protein, 22kDa
A12	Hs.303649	NM_002982	CCL2	Chemokine (C-C motif) ligand 2
B01	Hs.523852	NM_053056	CCND1	Cyclin D1
B02	Hs.82071	NM_006079	CITED2	Cbp/p300-interacting transactivator, with Glu/Asp-rich carboxy-terminal domain, 2
B03	Hs.173724	NM_001823	CKB	Creatine kinase, brain
B04	Hs.591346	NM_001901	CTGF	Connective tissue growth factor
B05	Hs.121575	NM_001909	CTSD	Cathepsin D
B06	Hs.260074	NM_000103	CYP19A1	Cytochrome P450, family 19, subfamily A, polypeptide 1
B07	Hs.72912	NM_000499	CYP1A1	Cytochrome P450, family 1, subfamily A, polypeptide 1
B08	Hs.409368	NM_004215	EBAG9	Estrogen receptor binding site associated, antigen, 9
B09	Hs.288741	NM_001962	EFNA5	Ephrin-A5
B10	Hs.534313	NM_004430	EGR3	Early growth response 3
B11	Hs.446352	NM_004448	ERBB2	V-erb-b2 erythroblastic leukemia viral oncogene homolog 2, neuro/glioblastoma derived oncogene homolog (avian)
B12	Hs.118681	NM_001982	ERBB3	V-erb-b2 erythroblastic leukemia viral oncogene homolog 3 (avian)
C01	Hs.208124	NM_000125	ESR1	Estrogen receptor 1
C02	Hs.729020	NM_001437	ESR2	Estrogen receptor 2 (ER beta)
C03	Hs.728789	NM_005252	FOS	FBJ murine osteosarcoma viral oncogene homolog
C04	Hs.163484	NM_004496	FOXA1	Forkhead box A1
C05	Hs.9914	NM_006350	FST	Follistatin
C06	Hs.461047	NM_000402	G6PD	Glucose-6-phosphate dehydrogenase
C07	Hs.20961	NM_001505	GPER	G protein-coupled estrogen receptor 1
C08	Hs.525600	NM_001017963	HSP90AA1	Heat shock protein 90kDa alpha (cytosolic), class A member 1
C09	Hs.160562	NM_000618	IGF1	Insulin-like growth factor 1 (somatomedin C)
C10	Hs.462998	NM_001552	IGFBP4	Insulin-like growth factor binding protein 4
C11	Hs.607212	NM_000599	IGFBP5	Insulin-like growth factor binding protein 5
C12	Hs.471508	NM_005544	IRS1	Insulin receptor substrate 1
D01	Hs.25292	NM_002229	JUNB	Jun B proto-oncogene
D02	Hs.171995	NM_001648	KLK3	Kallikrein-related peptidase 3
D03	Hs.522818	NM_000425	L1CAM	L1 cell adhesion molecule
D04	Hs.445351	NM_002305	LGALS1	Lectin, galactoside-binding, soluble, 1
D05	Hs.180878	NM_000237	LPL	Lipoprotein lipase
D06	Hs.713533	NM_000627	LTBP1	Latent transforming growth factor beta binding protein 1
D07	Hs.517617	NM_012323	MAFF	V-maf musculoaponeurotic fibrosarcoma oncogene homolog F (avian)
D08	Hs.643754	NM_004774	MED1	Mediator complex subunit 1
D09	Hs.297413	NM_004994	MMP9	Matrix metallopeptidase 9 (gelatinase B, 92kDa gelatinase, 92kDa type IV collagenase
D10	Hs.525629	NM_004689	MTA1	Metastasis associated 1
D11	Hs.202453	NM_002467	MYC	V-myc myelocytomatosis viral oncogene homolog (avian)
D12	Hs.159223	NM_005967	NAB2	NGFI-A binding protein 2 (EGR1 binding protein 2)
E01	Hs.596314	NM_003743	NCOA1	Nuclear receptor coactivator 1
E02	Hs.446678	NM_006540	NCOA2	Nuclear receptor coactivator 2
E03	Hs.592142	NM_181659	NCOA3	Nuclear receptor coactivator 3
E04	Hs.462323	NM_006311	NCOR1	Nuclear receptor corepressor 1
E05	Hs.137510	NM_006312	NCOR2	Nuclear receptor corepressor 2
E06	Hs.235935	NM_002514	NOV	Nephroblastoma overexpressed gene
E07	Hs.268490	NM_000475	NR0B1	Nuclear receptor subfamily 0, group B, member 1
E08	Hs.427055	NM_021969	NR0B2	Nuclear receptor subfamily 0, group B, member 2
E09	Hs.466148	NM_005234	NR2F6	Nuclear receptor subfamily 2, group F, member 6
E10	Hs.122926	NM_000176	NR3C1	Nuclear receptor subfamily 3, group C, member 1 (glucocorticoid receptor)
E11	Hs.33446	NM_003822	NR5A2	Nuclear receptor subfamily 5, group A, member 2
E12	Hs.155017	NM_003489	NRIP1	Nuclear receptor interacting protein 1
F01	Hs.131704	NM_003873	NRP1	Neuropilin 1
F02	Hs.444751	NM_002614	PDZK1	PDZ domain containing 1
F03	Hs.716438	NM_014389	PELP1	Proline, glutamate and leucine rich protein 1
F04	Hs.32405	NM_000926	PGR	Progesterone receptor
F05	Hs.504620	NM_007273	PHB2	Prohibitin 2
F06	Hs.494538	NM_000264	PTCH1	Patched 1
F07	Hs.196384	NM_000963	PTGS2	Prostaglandin-endoperoxide synthase 2 (prostaglandin G/H synthase and cyclooxygenase)
F08	Hs.6906	NM_005402	RALA	V-ral simian leukemia viral oncogene homolog A (ras related)
F09	Hs.654583	NM_000964	RARA	Retinoic acid receptor, alpha
F10	Hs.275243	NM_014624	S100A6	S100 calcium binding protein A6
F11	Hs.728802	NM_002967	SAFB	Scaffold attachment factor B
F12	Hs.48029	NM_005985	SNAI1	Snail homolog 1 (Drosophila)
G01	Hs.527973	NM_003955	SOCS3	Suppressor of cytokine signaling 3
G02	Hs.313	NM_000582	SPP1	Secreted phosphoprotein 1
G03	Hs.162807	NM_003225	TFF1	Trefoil factor 1
G04	Hs.170009	NM_003236	TGFA	Transforming growth factor, alpha
G05	Hs.592317	NM_003239	TGFB3	Transforming growth factor, beta 3
G06	Hs.164226	NM_003246	THBS1	Thrombospondin 1
G07	Hs.524368	NM_000376	VDR	Vitamin D (1,25- dihydroxyvitamin D3) receptor
G08	Hs.73793	NM_003376	VEGFA	Vascular endothelial growth factor A
G09	Hs.592145	NM_003881	WISP2	WNT1 inducible signaling pathway protein 2
G10	Hs.25766	NM_030761	WNT4	Wingless-type MMTV integration site family, member 4
G11	Hs.696364	NM_003392	WNT5A	Wingless-type MMTV integration site family, member 5A
G12	Hs.437638	NM_005080	XBP1	X-box binding protein 1
H01	Hs.520640	NM_001101	ACTB	Actin, beta. Housekeeping gene
H02	Hs.534255	NM_004048	B2M	Beta-2-microglobulin. Housekeeping gene
H03	Hs.592355	NM_002046	GAPDH	Glyceraldehyde-3-phosphate dehydrogenase. Housekeeping gene
H04	Hs.412707	NM_000194	HPRT1	Hypoxanthine phosphoribosyltransferase 1. Housekeeping gene
H05	Hs.546285	NM_001002	RPLP0	Ribosomal protein, large, P0. Housekeeping gene
H06	N/A	SA_00105	HGDC	Human Genomic DNA Contamination control
H07	N/A	SA_00104	RTC	Reverse Transcription Control
H08	N/A	SA_00104	RTC	Reverse Transcription Control
H09	N/A	SA_00104	RTC	Reverse Transcription Control
H10	N/A	SA_00103	PPC	Positive PCR Control
H11	N/A	SA_00103	PPC	Positive PCR Control
H12	N/A	SA_00103	PPC	Positive PCR Control

## Sheet: Supplementary Table 4
	ESR1mut patients N=21 (%)	NF1mut patients N=17 (%)	p (Fisher's test if values ≤5)
Type of prior therapy
Adjuvant endocrine therapy	16 (76.2%)	14 (82.4%)	0.7087
Tamoxifen	13 (61.9%)	11 (64.7%)	>0.999
AI	7 (33.3%)	6 (35.3%)	>0.999
Adjuvant chemotherapy	10 (47.6%)	15 (88.2%)	0.0151
Metastatic endocrine therapy	15 (71.4%)	3 (17.6%)	0.0013
Tamoxifen	3 (14.3%)	0 (0%)	0.2383
AI	17 (80.9%)	3 (17.6%)	0.0002
Fulvestrant*	3 (14.3%)	0 (0%)	0.2383
Exemestane+Everolimus	4 (19.0%)	1 (5.9%)	0.3551
Metastatic chemotherapy	13 (61.9%)	7 (41.2%)	0.3275
1 lines	8 (38.1%)	4 (23.5%)	0.4862
2 lines	2 (9.5%)	1 (5.9%)	>0.999
3 lines	2 (9.5%)	2 (11.8%)	>0.999
4 lines	1 (4.8)	0 (0%)	>0.999
* 1 patient received Fulvestrant + Palbociclib

## Sheet: Supplementary Table 5
	DFS (years)
	HR+/HER2-	n	Mantel-Haenszel HR (95% CI)	p	HER2+	n	Mantel-Haenszel HR (95% CI)	p	TN	n	Mantel-Haenszel HR (95% CI)	p
TP53 WT	5.545	78	1.173 (0.7585 - 1.815)	0.47	3.965	2	1.114 (0.269 - 4.617)	0.88	3	7	1.724 (0.7932 - 3.745)	0.16
TP53 mut	3.525	32			2.79	19			1.75	29
PIK3CA WT	5.09	66	0.813 (0.5546 - 1.192)	0.28	2.81	14	1.213 (0.4551 - 3.235)	0.69	1.75	29	0.8955 (0.3758 - 2.134)	0.8
PIK3CA mut	6.29	44			2.42	7			1.84	7
GATA3 WT	5.3	99	1.075 (0.5626 - 2.053)	0.82	2.75	19	0.6628 (0.1894 - 2.319)	0.51	1.75	36	NA	NA
GATA3 mut	6.4	11			4.435	2			NA	0
MAP3K1 WT	5.15	103	0.5324 (0.3012 - 0.9411)	0.03	2.77	20	0.2517 (0.05834 - 1.086)	0.06	1.75	36	NA	NA
MAP3K1 mut	9.55	7			6.24	1			NA	0
ESR1 WT	5.5	99	1.427 (0.6991 - 2.911)	0.32	2.77	20	0.4392 (0.1018 - 1.895)	0.27	1.75	36	NA	NA
ESR1 mut	4.8	11			5.92	1			NA	0
CDH1 WT	5.42	95	0.8912 (0.5262 - 1.509)	0.66	2.84	19	6.26 (0.5838 - 67.12)	0.12	1.65	34	0.363 (0.1329 - 0.9914)	0.04
CDH1 mut	5.75	15			2.4	2			5.61	2
PTEN WT	5.5	98	1.267 (0.6564 - 2.444)	0.48	2.815	20	2.46 (0.1575 - 38.4)	0.52	1.75	31	4.887 (0.9792 - 24.39)	0.0531
PTEN mut	3.575	12			2.67	1			1.07	4
NF1 WT	5.67	100	4.464 (1.65 - 12.08)	0.003	2.75	19	0.6036 (0.1689 - 2.158)	0.43	1.655	32	0.3609 (0.1529 - 0.8521)	0.02
NF1 mut	3.14	10			4.355	2			6.125	4
AKT1 WT	5.42	99	1.049 (0.5529 - 1.991)	0.88	2.79	21	NA	NA	1.655	34	0.3035 (0.1144 - 0.8057)	0.01
AKT1 mut	6.4	11			NA	0			6.52	2
ERBB2 WT	5.5	105	2.044 (0.64 - 6.529)	0.22	2.88	18	614.2 (27.33 - 13803)	<0.001	1.75	31	0.8999 (0.3545 - 2.284)	0.82
ERBB2 mut	3.09	5			1.25	3			1.84	5
DFS = Disease free survival (measured from date of diagnosis to date of recurrence)
NA=No cases meeting criteria
Phenotypes asses by IHC (performed on primary sample for TTR and on metastatic for advanced OS)

## Sheet: Supplementary Table 6
	Advanced OS (years)
	HR+/HER2-	n	Mantel-Haenszel HR (95% CI)	p	HER2+	n	Mantel-Haenszel HR (95% CI)	p	TN	n	Mantel-Haenszel HR (95% CI)	p
TP53 WT	5.72	103	2.334 (1.264 - 4.312)	0.0068	2.83	3	0.2131 (0.0084 - 5.405)	0.3486	6.395	8	1.838 (0.7494 - 4.506)	0.18
TP53 mut	4.01	40			Not reached	16			2.27	37
PIK3CA WT	4.43	87	0.6705 (0.401 - 1.121)	0.1277	Not reached	12	2.437 (0.2874 - 20.67)	0.32	2.27	33	0.7745 (0.3281 - 1.828)	0.55
PIK3CA mut	7.01	56			3.65	7			4.31	12
GATA3 WT	5.42	124	0.902 (0.4551 - 1.788)	0.7677	Not reached	17	Undefined	>0.99	2.38	42	0.3185 (0.08722 - 1.163)	0.14
GATA3 mut	7.08	19			Not reached	2			Not reached	3
MAP3K1 WT	4.7	129	0.4994 (0.2522 - 0.9892)	0.0465	Not reached	18	0.3375 (0.001834 - 62.12)	0.6831	2.38	44	0.3476 (0.04654 - 2.596)	0.3
MAP3K1 mut	11.78	14			Not reached	1			Not reached	1
ESR1 WT	5.88	124	1.234 (0.6287 - 2.422)	0.5412	Not reached	18	0.3293 (0.006564 - 16.52)	0.5781	2.38	44	0.317 (0.06169 - 1.629)	0.16
ESR1 mut	3.88	19			Not reached	1			Not reached	1
CDH1 WT	5.88	123	2.301 (0.9217 - 5.745)	0.0742	Not reached	18	401 (2.179 - 73818)	0.0243	3.12	42	2.726 (0.3712 - 20.02)	0.32
CDH1 mut	3.88	20			2.18	1			1.68	3
PTEN WT	5.72	130	1.25 (0.4091 - 3.821)	0.6951	Not reached	19	NA	NA	2.38	41	0.6873 (0.2046 - 2.31)	0.54
PTEN mut	5.42	13			NA	0			5.62	4
NF1 WT	5.72	133	1.47 (0.5575 - 3.877)	0.4359	Not reached	16	5.654 (0.2004 - 159.6)	0.3093	2.38	41	0.9619 (0.2309 - 4.008)	0.95
NF1 mut	3.67	10			Not reached	3			4.31	4
AKT1 WT	5.42	129	0.8428 (0.3981 - 1.785)	0.6551	Not reached	19	NA	NA	2.38	44	0.317 (0.06169 - 1.629)	0.29
AKT1 mut	4.65	14			NA	0			Not reached	1
ERBB2 WT	5.42	137	4.355 (0.7265 - 26.11)	0.1073	Not reached	16	1.709 (0.1276 - 22.89)	0.6857	3.12	42	1.781 (0.2991 - 10.61)	0.52
ERBB2 mut	2.395	6			2.94	3			1.975	3
Advanced OS= Advanced overall survival (measured from date of recurrence to last follow-up)
NA=No cases meeting criteria
Phenotypes asses by IHC (performed on primary sample for TTR and on metastatic for advanced OS)
